# Supplementary material
Source: MDPI journal article supplement (https://www.mdpi.com/2073-4395/10/12/1863)
Supplement: s1 [file s1]

## *Supplementary Material*

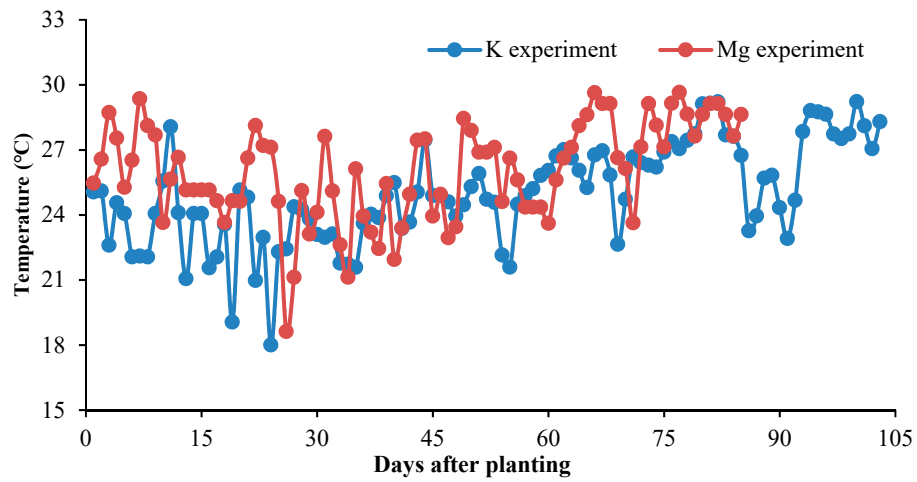

**Supplementary Figure S1** Mean daily temperatures (recorded every two hours) in the vegetation period during the Mg and K experiments in the greenhouse.

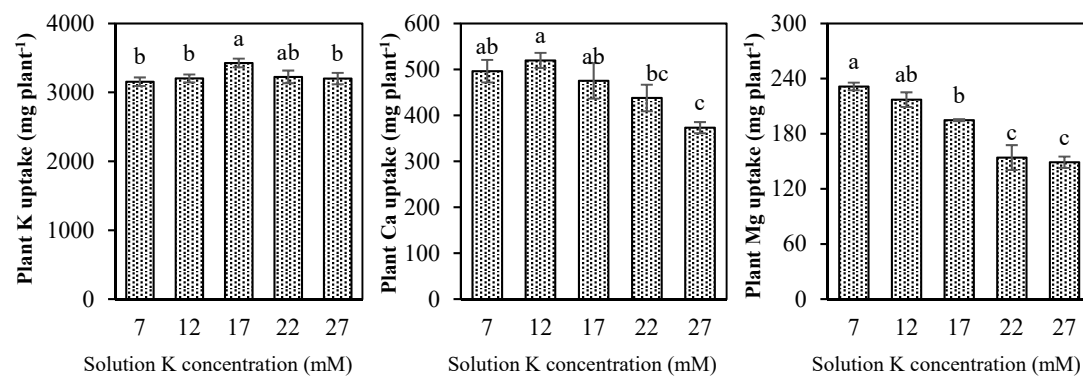

**Supplementary Figure S2** Effects of K concentrations in solution on plant potassium (K), calcium (Ca), and magnesium (Mg) uptake by cherry tomato plants. Values are means  $\pm$  standard error (SE) among three replicates. For each nutrient, means with the same letters did not differ significantly at  $P < 0.05$ .

**Table S1.** Critical leaf Mg concentrations for tomato growth in different substrates.

| Substrate type | Growth period  | Critical leaf Mg concentration | Evaluation indicator    | References                      |
|----------------|----------------|--------------------------------|-------------------------|---------------------------------|
| Soils          | Anthesis       | 4.0 g kg <sup>-1</sup>         | Plant growth            | Reuter et al., 1986             |
| Soils          | First harvest  | 3.0 g kg <sup>-1</sup>         | Plant growth            | Reuter et al., 1986             |
| Soils          | Second harvest | 4.0 g kg <sup>-1</sup>         | Plant growth            | Piggott,1970                    |
| Soils          | First harvest  | 3.2 g kg <sup>-1</sup>         | Plant growth            | Davidescu et al.,1982           |
| Soils          | Harvest        | 3.9 g kg <sup>-1</sup>         | Dry matter accumulation | Hauer-Jákli and Tränkner (2019) |
| Coconut coir   | First harvest  | 4.38 g kg <sup>-1</sup>        | Dry matter formation    | This study                      |
| Coconut coir   | Second harvest | 4.50 g kg <sup>-1</sup>        | Dry matter formation    | This study                      |
